# Supplementary material for: Whole-genome sequencing to investigate a non-clonal melioidosis cluster on a remote Australian island
Source: PubMed Central journal article supplement (PMC5610713; doi:10.1099/mgen.0.000117), 2017-06-13
Supplement: mgen-3-117-s001.pdf [file mgen-3-117-s001.pdf]

## Figure Legends

**Fig S1. Pulsed-field gel electrophoresis analysis using *SpeI* of environmental and clinical *Burkholderia pseudomallei* isolates involved in a case cluster occurring in a remote island community.** Note that both ST-125 and ST-126 isolates appear identical using this typing method and led to the original conclusion of a clonal outbreak (Currie *et al.*, 2001). A similar figure was published previously in the original study (Currie *et al.*, 2001); however, strain names, environmental strains and some clinical strains were omitted from the original figure but have been included in this figure for clarity.

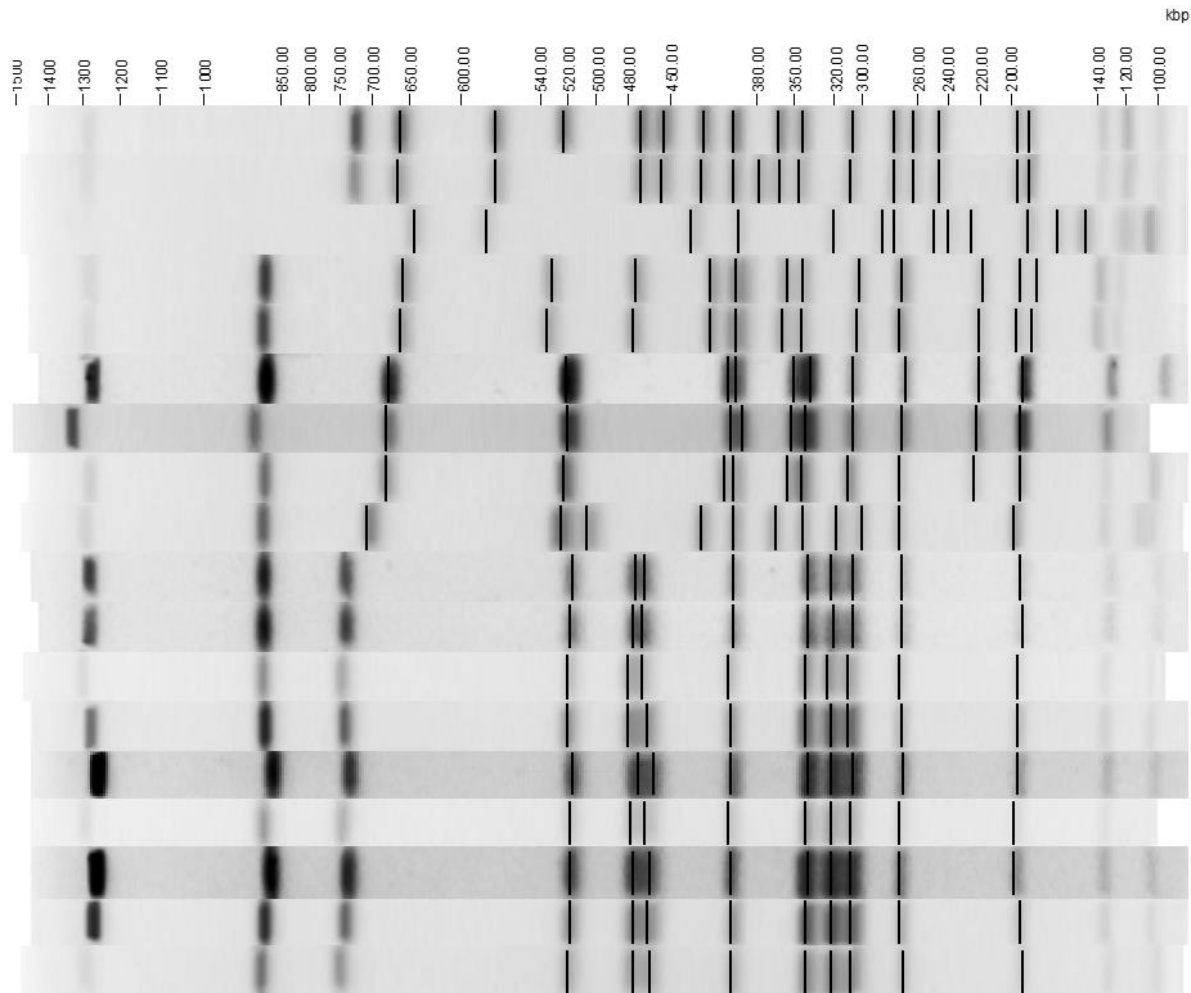

**Fig S2. Phylogenetic reconstruction in comparison to predicted recombination block distribution of the ST-125 and ST-126 strains.**

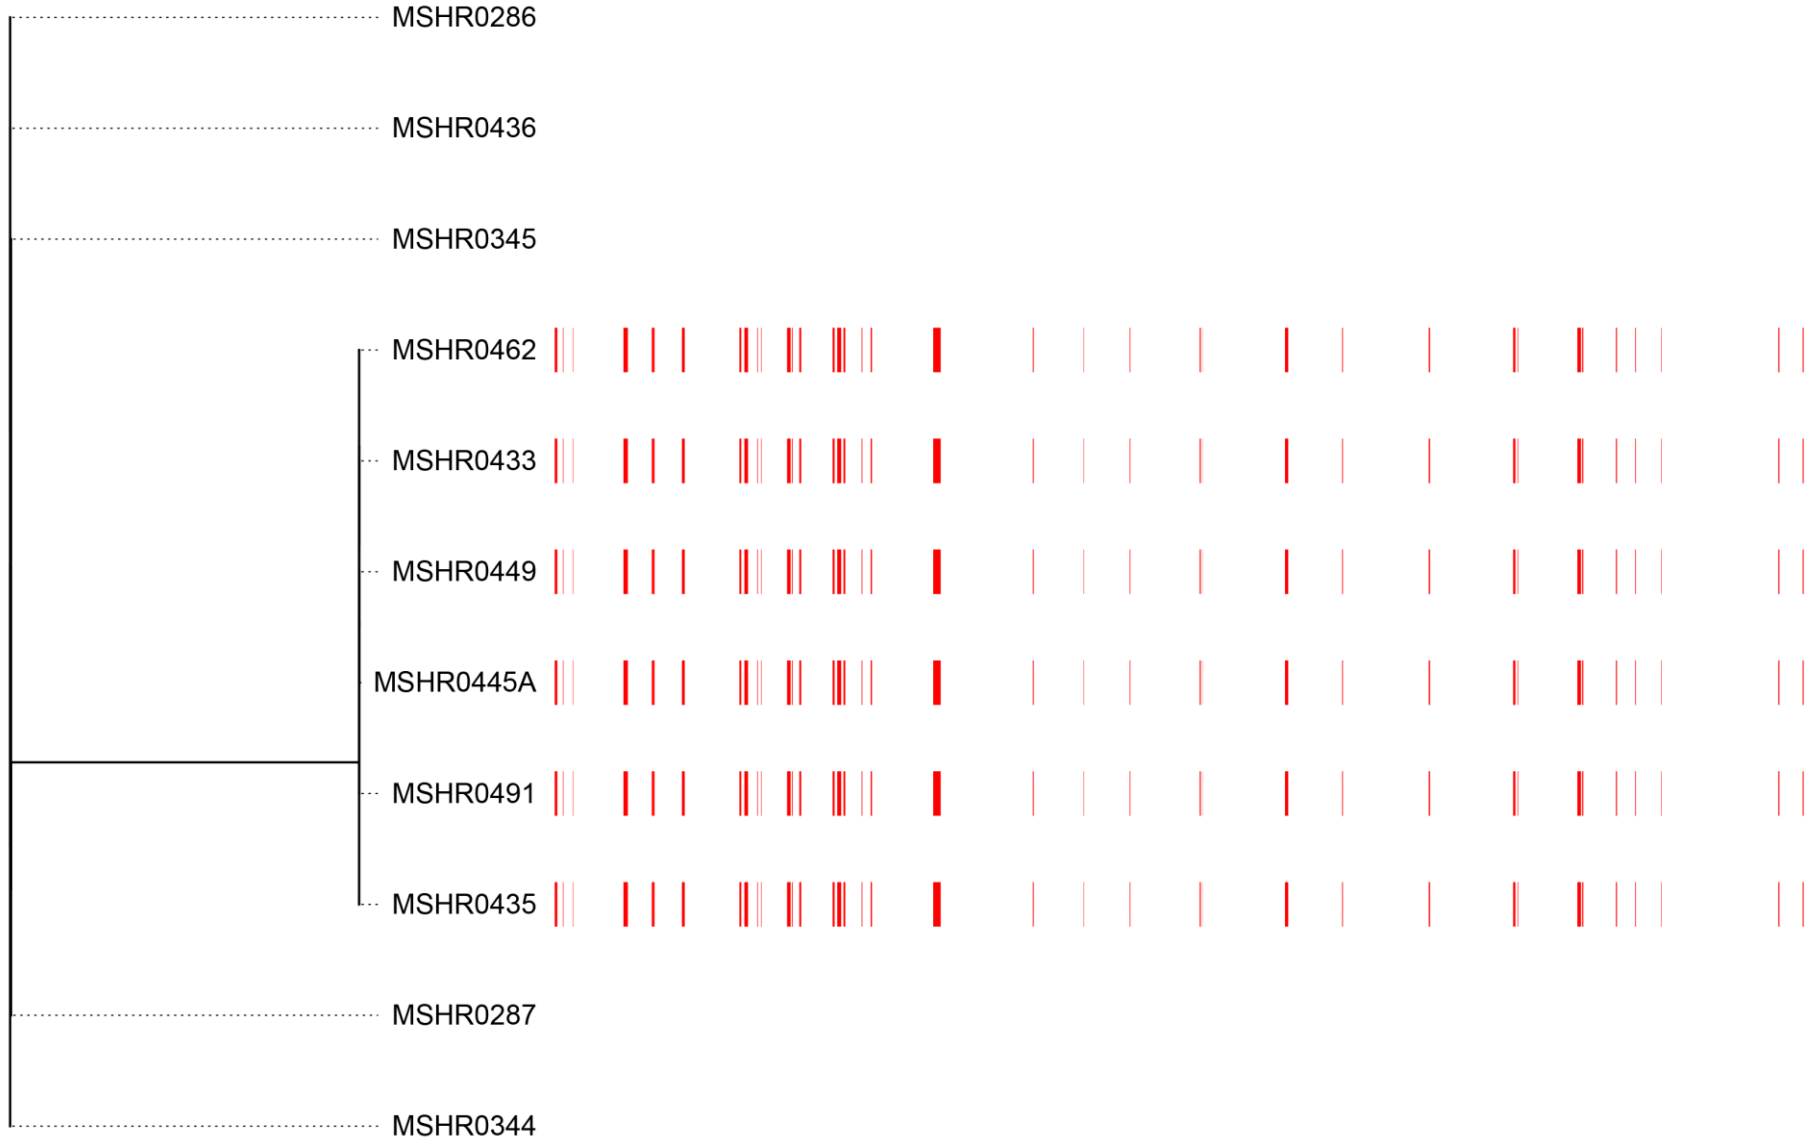

**Fig S3. Phylogenetic reconstruction in comparison to genome wide single-nucleotide polymorphism distribution of the ST-125 and ST-126 strains.**

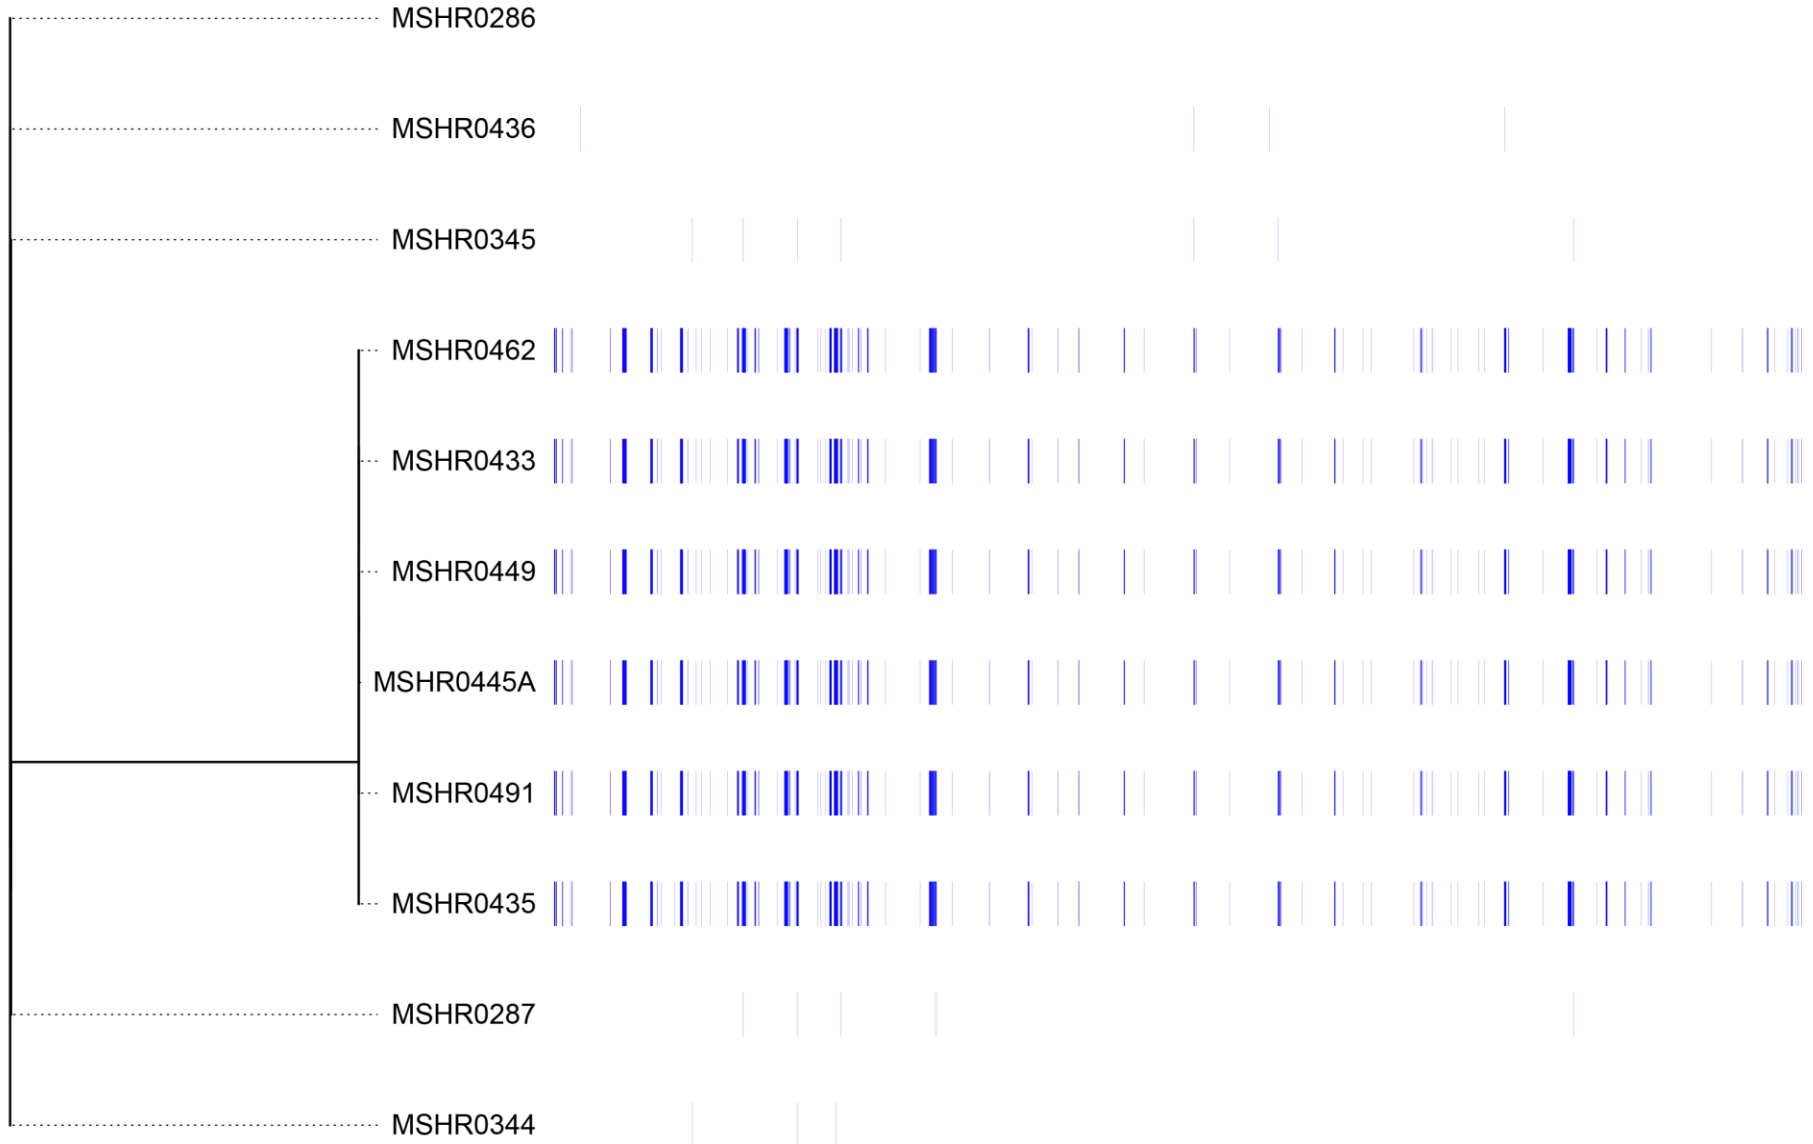

**Table S1: Summary of recombination prediction for ST-125 and ST-126 strains using Gubbins**

| Node      | Total SNPs | SNPs inside recombination blocks | SNPs outside recombination blocks | Recombination Blocks | Bases in Recombination blocks | Recombination to mutation ratio | Bases in Clonal Frame |
|-----------|------------|----------------------------------|-----------------------------------|----------------------|-------------------------------|---------------------------------|-----------------------|
| MSHR0286  | 0          | 0                                | 0                                 | 0                    | 0                             | 0                               | 7356446               |
| MSHR0287  | 2          | 0                                | 2                                 | 0                    | 0                             | 0                               | 7356446               |
| MSHR0344  | 3          | 0                                | 3                                 | 0                    | 0                             | 0                               | 7356446               |
| MSHR0345  | 4          | 0                                | 4                                 | 0                    | 0                             | 0                               | 7356446               |
| MSHR0433  | 1          | 0                                | 1                                 | 0                    | 339312                        | 0                               | 7017098               |
| MSHR0435  | 2          | 0                                | 2                                 | 0                    | 339312                        | 0                               | 7017098               |
| MSHR0436  | 4          | 0                                | 4                                 | 0                    | 0                             | 0                               | 7356446               |
| MSHR0445A | 0          | 0                                | 0                                 | 0                    | 339312                        | 0                               | 7017098               |
| MSHR0449  | 0          | 0                                | 0                                 | 0                    | 339312                        | 0                               | 7017098               |
| MSHR0462  | 1          | 0                                | 1                                 | 0                    | 339312                        | 0                               | 7017098               |
| MSHR0491  | 0          | 0                                | 0                                 | 0                    | 339312                        | 0                               | 7017098               |
| Node5*    | 1343       | 1270                             | 73                                | 36                   | 339312                        | 17.4                            | 7356446               |
| Node3*    | 3          | 0                                | 3                                 | 0                    | 0                             | 0                               | 7356446               |

\*Node 5= Separation between ST-125 and ST-126; Node 3= Node shared between MSHR0344 and MSHR0345. N.B. Nodes with no variation have been removed from this table. Abbreviations: SNP, single-nucleotide polymorphism.
